# Supplementary material
Source: publisher figshare collection journal article supplement (https://sage.figshare.com/ndownloader/files/20333442)
Supplement: Supplementary file 1 [file 20333442]

## Supplementary figure S6. Expectations regarding the new DMT by EDSS score subgroup

Figure S6a. Physicians' expectations by EDSS score subgroup<sup>a</sup>

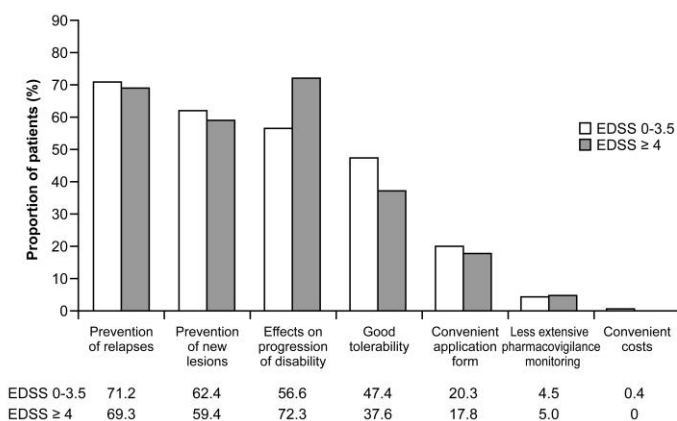

| EDSS score subgroup                         | Patient number |              | Missing<br>N=26 |
|---------------------------------------------|----------------|--------------|-----------------|
|                                             | 0-3.5<br>N=468 | ≥ 4<br>N=101 |                 |
| Prevention of relapses                      | 333            | 70           | 20              |
| Prevention of new lesions                   | 292            | 60           | 13              |
| Effects on progression of disability        | 265            | 73           | 10              |
| Good tolerability                           | 222            | 38           | 14              |
| Convenient application form                 | 95             | 18           | 7               |
| Less extensive pharmacovigilance monitoring | 21             | 5            | 1               |
| Convenient costs                            | 2              | 0            | 0               |

Figure S6b. Patients' expectations by EDSS score subgroup<sup>b</sup>

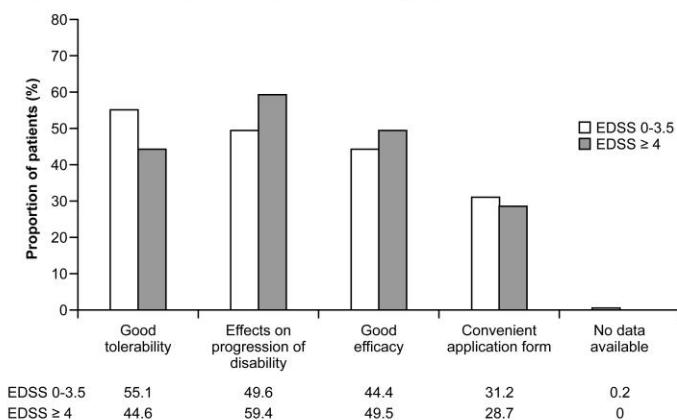

| EDSS score subgroup                  | Patient number |              | Missing<br>N=26 |
|--------------------------------------|----------------|--------------|-----------------|
|                                      | 0-3.5<br>N=468 | ≥ 4<br>N=101 |                 |
| Good tolerability                    | 258            | 45           | 18              |
| Effects on progression of disability | 232            | 60           | 10              |
| Good efficacy                        | 208            | 50           | 7               |
| Convenient application form          | 146            | 29           | 10              |
| No data available                    | 1              | 0            | 0               |

<sup>a</sup>Data were recorded using physician questionnaires. Up to three answers were possible. Answer options: relevance of drug characteristics with regard to prevention of relapses, prevention of new lesions, effects on progression of disability, good tolerability, less extensive pharmacovigilance monitoring, convenient application form, costs.

<sup>b</sup>Data were recorded using patient questionnaires. Up to two answers were possible. Answer options: relevance of drug characteristics with regard to good effectiveness, effects on progression of disability, good tolerability, convenient application form.

DMT, disease modifying therapy; EDSS, Expanded Disability Status Scale.
